# Supplementary material for: A 70-Gene Signature for Predicting Treatment Outcome in Advanced-Stage Cervical Cancer
Source: PubMed Central journal article supplement — Mol Ther Oncolytics. 2020 Sep 5;19:47–56. doi: 10.1016/j.omto.2020.09.001 (PMC7530249; doi:10.1016/j.omto.2020.09.001), 2020-09-05
Supplement: mmc1.pdf [file mmc1.pdf]

**OMTO, Volume 19**

**Supplemental Information**

**A 70-Gene Signature for Predicting Treatment**

**Outcome in Advanced-Stage Cervical Cancer**

**Ngoc Ngo Yen Nguyen, Tae Gyu Choi, Jieun Kim, Min Hyung Jung, Seok Hoon Ko, Yoonhwa Shin, Insug Kang, Joo-hun Ha, Sung Soo Kim, and Yong Hwa Jo**

Figure S1.

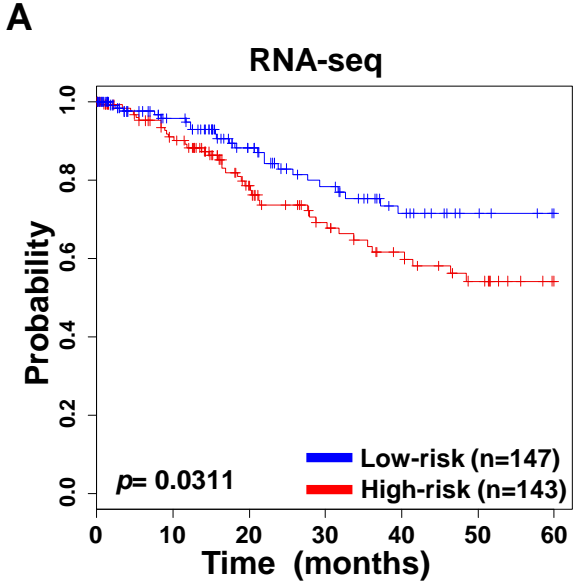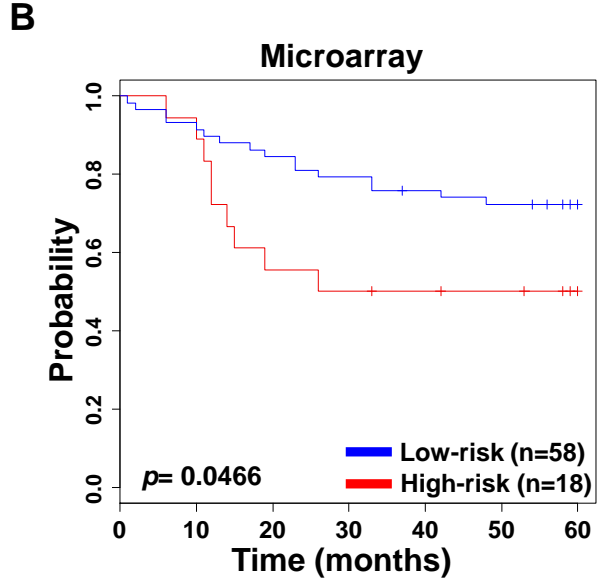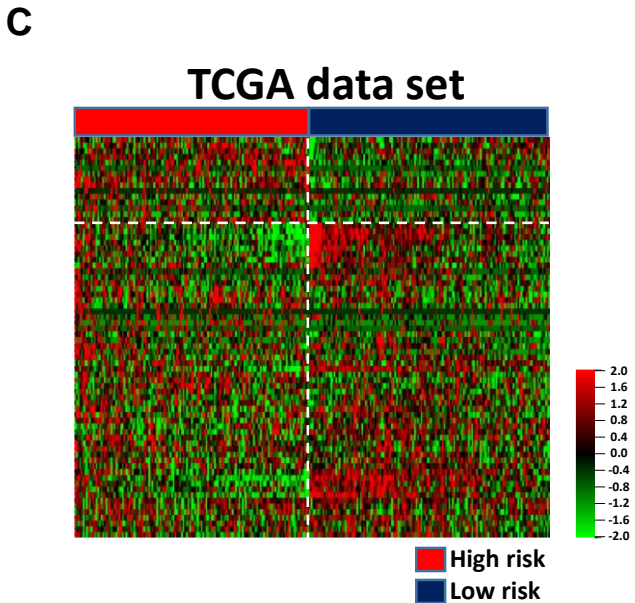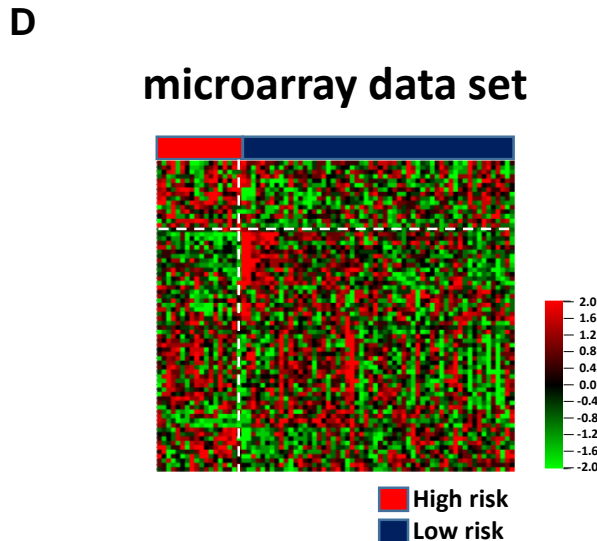

**Figure S1. Validation of the 70-gene signature in independent data sets. (A-B)**

Incorporation of 70-gene signature into patients with RNA-seq of TCGA (A), microarray of GSE39001 and GSE52904 (B). Each group was classified by 70-gene signature into low- and high-risk, and evaluated by Kaplan-Meier analysis. The  $p$  values were computed by the log-rank test. (C). Heatmap of median centered 70-gene expression profiles between high- and low-risk groups in TCGA data sets (red, relative high expression; green, relative low expression). (D). Heatmap of median centered 70-gene expression profiles between high- and low-risk groups in TCGA data sets (red, relative high expression; green, relative low expression).

Figure S2.

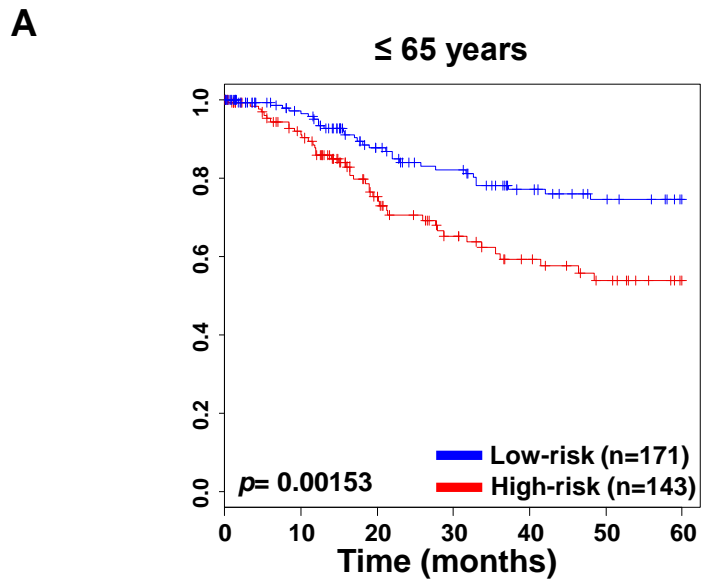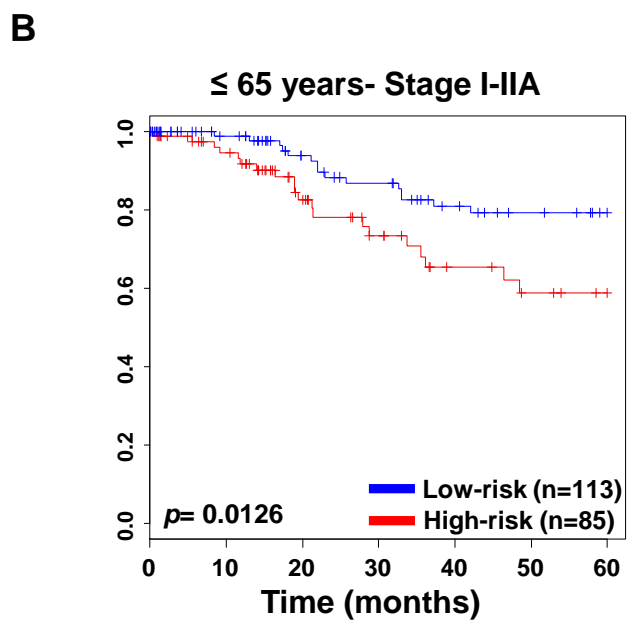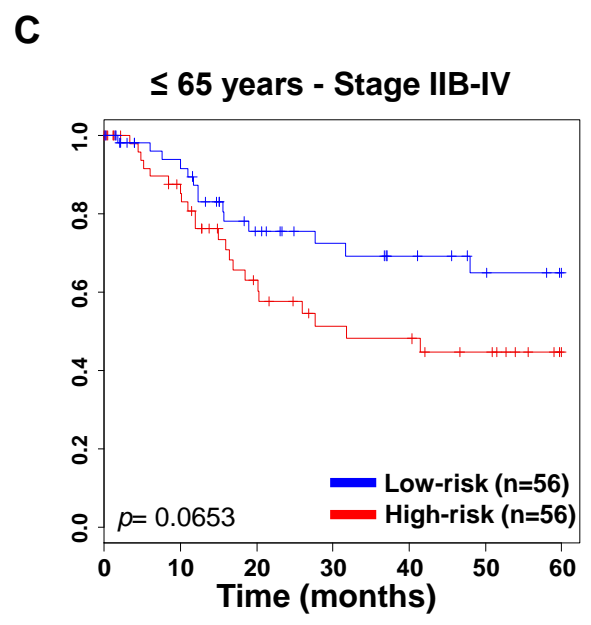

**Figure S2. Survival analysis of patients under 65 years old by the 70-gene signature. (A-C)**

The 70-gene signature was applied to patients under 65 years old (A), early-stage (B), advanced-stage (C). Each group was classified by 70-gene signature into low- and high-risk, and evaluated by Kaplan-Meier analysis. The  $p$  values were computed by the log-rank test.

Figure S3.

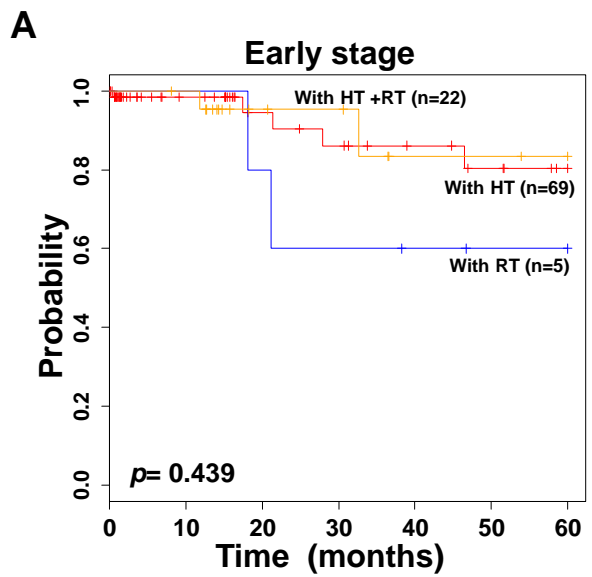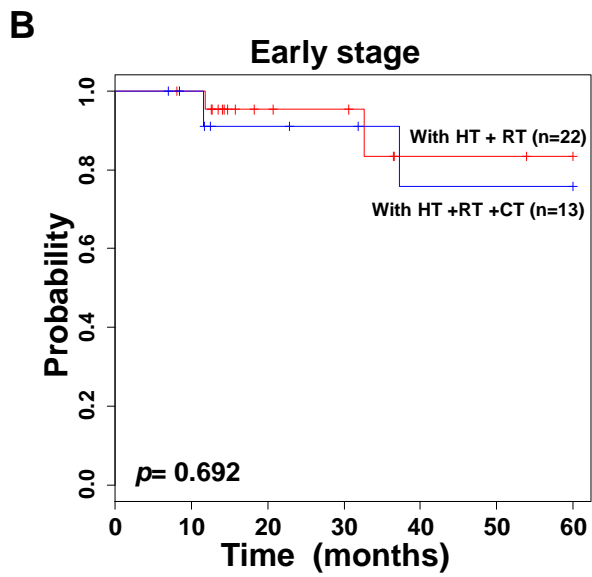

**Figure S3. Survival analysis by the treatment methods in patients with early-stage. (A)**

Patients were separated according to the conventional therapies; hysterectomy and/or radiotherapy. **(B)** Effect of additional chemotherapy with hysterectomy and radiotherapy. The  $p$  values were computed by the log-rank test. CT, chemotherapy; HT, hysterectomy; RT, radiotherapy

Figure S4.

Advanced stage – chemoradation therapy

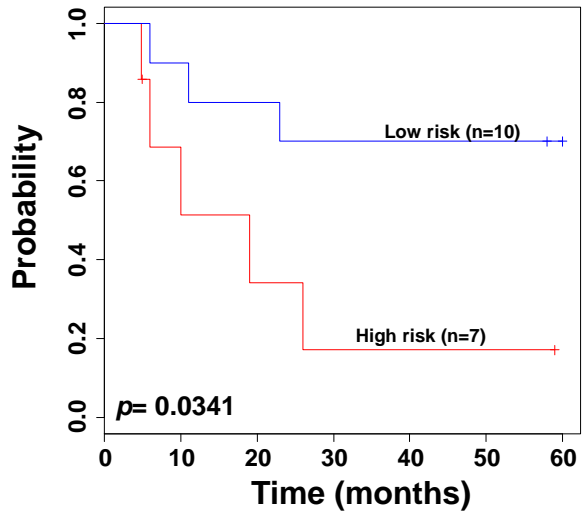



**Figure S4. Survival analysis of advanced-stage patients treated with chemoradiation therapy by the 70-gene signature.** Incorporation of 70-gene signature into patients with chemoradiation therapy. Each group was classified by 70-gene signature into low- and high-risk, and evaluated by Kaplan-Meier analysis. The  $p$  values were computed by the log-rank test.

Figure S5.

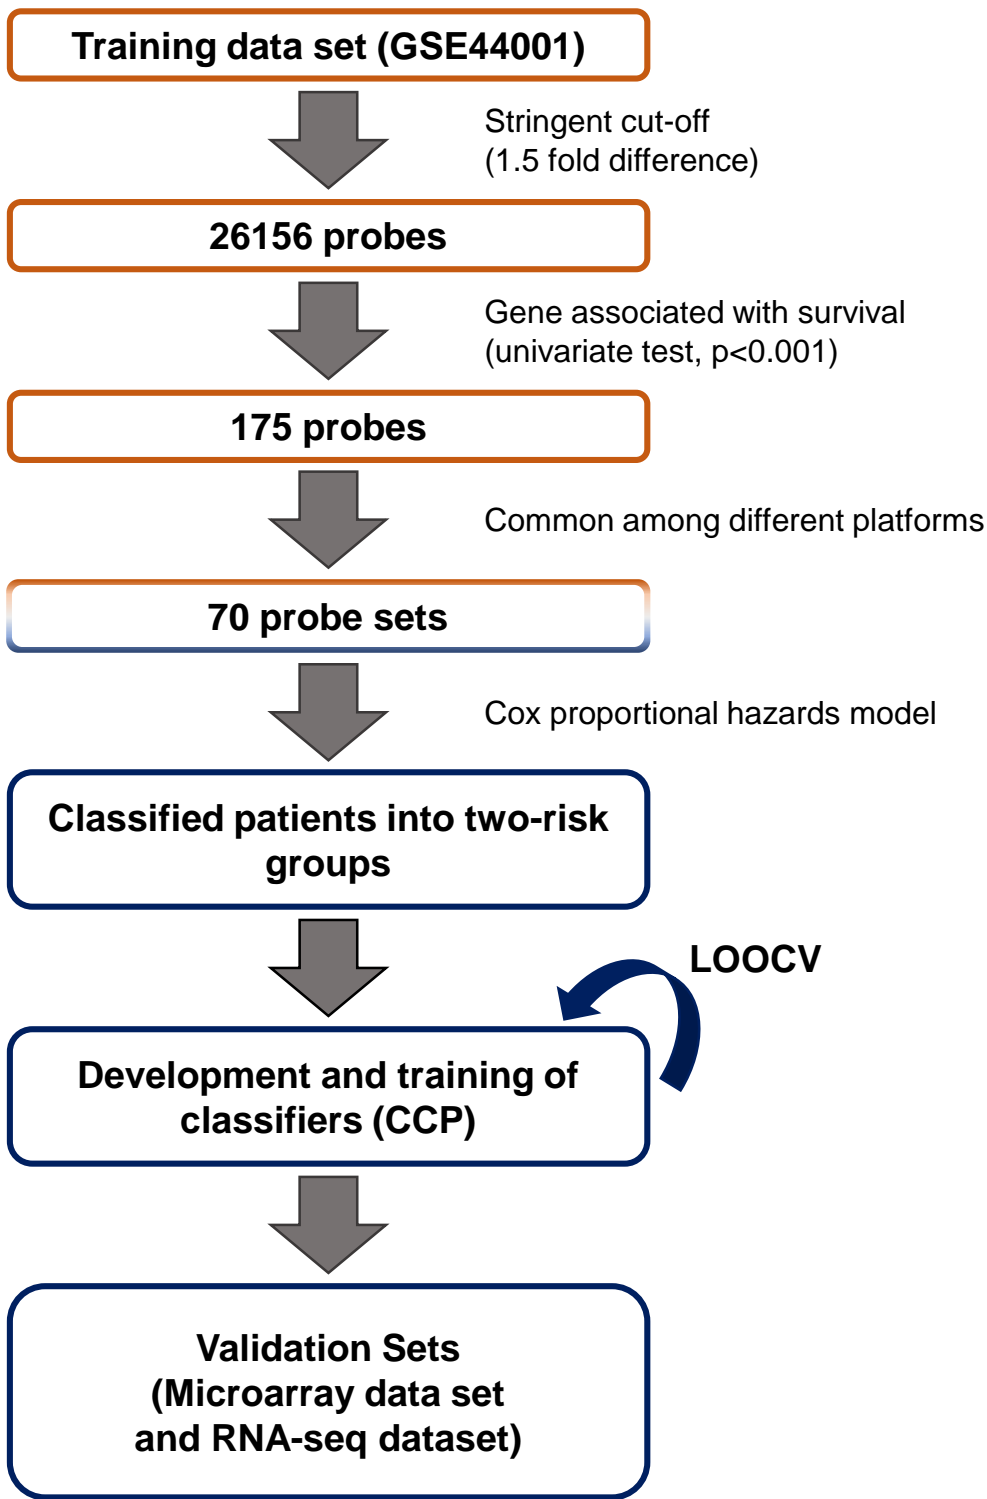

**Figure S5. Work flowchart of the applied analysis**

**Table S1. Univariate and multivariate Cox proportional hazard regression of prognosis with stage.**

| Variables                        | Univariate |               |                | Multivariate |               |                |
|----------------------------------|------------|---------------|----------------|--------------|---------------|----------------|
|                                  | HR         | 95%CI         | <i>p</i> value | HR           | 95%CI         | <i>p</i> value |
| <b>Stage<br/>(Stage IIB-IV)</b>  | 3.547      | 2.466 – 5.103 | <b>8.8e-12</b> | 3.691        | 2.564 – 5.313 | <b>2.2e-12</b> |
| <b>Signature<br/>(High risk)</b> | 2.265      | 1.566 – 3.275 | <b>1.4e-05</b> | 2.369        | 1.637 – 3.428 | <b>4.8e-06</b> |

HR, Hazard Ratio; CI, Confidence Interval; the Wald test was used to estimate *p*-values. All statistical tests were two-sided.

**Table S2. Univariate and multivariate Cox proportional hazard regression analysis of prognosis with size.**

| Variables                        | Univariate |               |                | Multivariate |                |                |
|----------------------------------|------------|---------------|----------------|--------------|----------------|----------------|
|                                  | HR         | 95%CI         | <i>p</i> value | HR           | 95%CI          | <i>p</i> value |
| <b>Size<br/>(≥4 cm)</b>          | 3.703      | 1.917 - 7.152 | <b>9.7e-05</b> | 2.724        | 1.397 – 5.311  | <b>0.00326</b> |
| <b>Signature<br/>(High-risk)</b> | 6.769      | 2.632 -17.409 | <b>7.3e-05</b> | 5.491        | 2.108 – 14.304 | <b>0.00049</b> |

HR, Hazard Ratio; CI, Confidence Interval; the Wald test was used to estimate *p*-values. All statistical tests were two-sided.

**Table S3. Univariate and multivariate Cox proportional hazard regression analysis of prognosis.**

| Variables                                    | Univariate |              |                | Multivariate |               |                |
|----------------------------------------------|------------|--------------|----------------|--------------|---------------|----------------|
|                                              | HR         | 95%CI        | <i>p</i> value | HR           | 95%CI         | <i>p</i> value |
| <b>Age under 65year<br/>(Advanced Stage)</b> | 2.144      | 1.346-3.416  | <b>0.0013</b>  | 2.048        | 1.284-3.265   | <b>0.0033</b>  |
| <b>Signature(high)</b>                       | 2.134      | 1.328 -3.432 | <b>0.0017</b>  | 2.095        | 1.303 – 3.368 | <b>0.0023</b>  |

HR, Hazard Ratio; CI, Confidence Interval; the Wald test was used to estimate *p*-values. All statistical tests were two-sided.

**Table S5. Cervical cancer RNA expression data sets.**

| <b>GEO Number</b> | <b>Origin /Year</b> | <b>Chip type</b>                                               | <b>References</b>      |
|-------------------|---------------------|----------------------------------------------------------------|------------------------|
| <b>TCGA</b>       |                     | IlluminaHiSeq                                                  |                        |
| <b>GSE39001</b>   | Mexico<br>2013      | Affymetrix Human HG-Focus Target Array                         | Espinosa et al.        |
| <b>GSE44001</b>   | Korea<br>2013       | Illumina HumanHT-12 WG-DASL V4.0 R2 expression beadchip        | Lee et al.             |
| <b>GSE52904</b>   | Mexico<br>2015      | Affymetrix Human Gene 1.0 ST Array [transcript (gene) version] | Medina-Martinez et al. |
